# Supplementary material for: N-Substituted tetrahydropentaazadibenzocycloheptafluorenes – a new type of condensed polyazapolycyclic system
Source: Royal Society of Chemistry journal article supplement (doi:10.1039/d0nj05270a), 2020-12-10
Supplement: d0nj05270a1.pdf [file d0nj05270a1.pdf]

## ELECTRONIC SUPPLEMENTARY MATERIALS

### ***N*-Substituted tetrahydropentaazadibenzocycloheptafluorenes – a new type of condensed polyazapolycyclic system**

Elena B. Rakhimova\*, Victor Yu. Kirsanov, Ekaterina S. Mescheryakova,  
Leonard M. Khalilov, Askhat G. Ibragimov

*Institute of Petrochemistry and Catalysis, Russian Academy of Sciences,  
141 Prospekt Oktyabrya, 450075 Ufa, Russian Federation*

#### **Table of contents**

|                                            |       |
|--------------------------------------------|-------|
| NMR and MS spectra of compounds <b>2-8</b> | 2–15  |
| X-ray data of compound <b>3</b>            | 16–19 |

11b,11c-Dihydro-6*H*,12*H*-4b,5a,10b,11a-tetraazadibenzo[*a,h*]cyclopenta[*def*]fluorene (**2**)

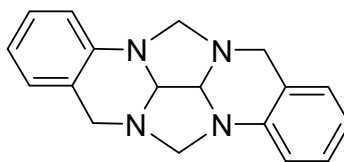

Figure 1. NMR and MS spectra of compound **2**.

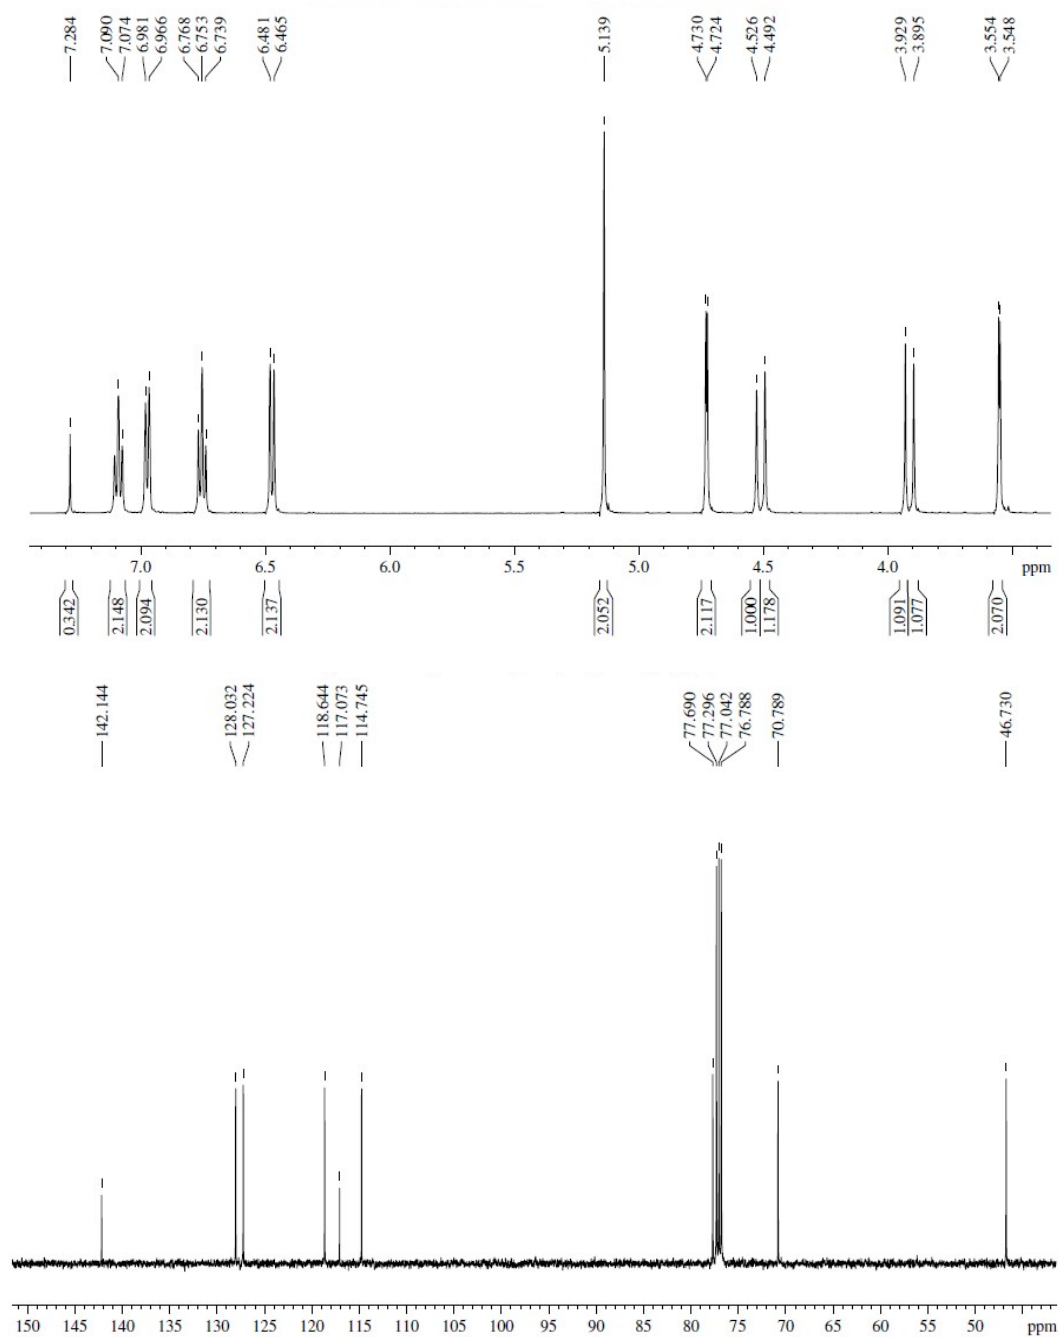

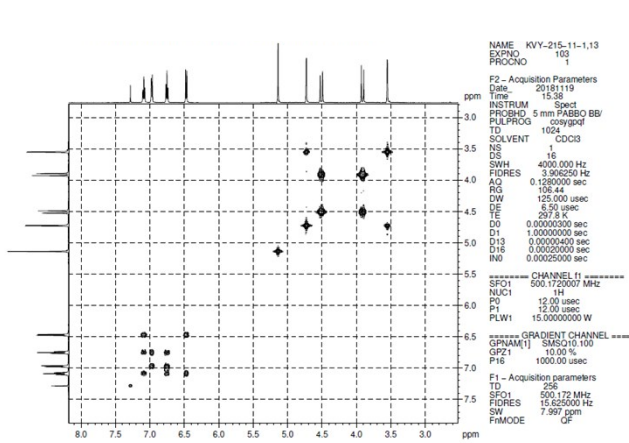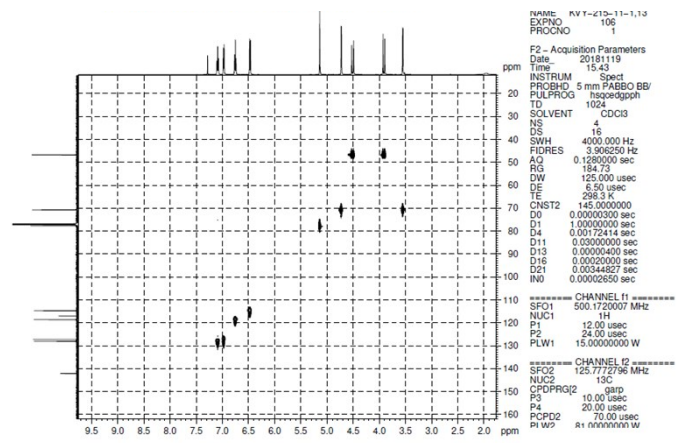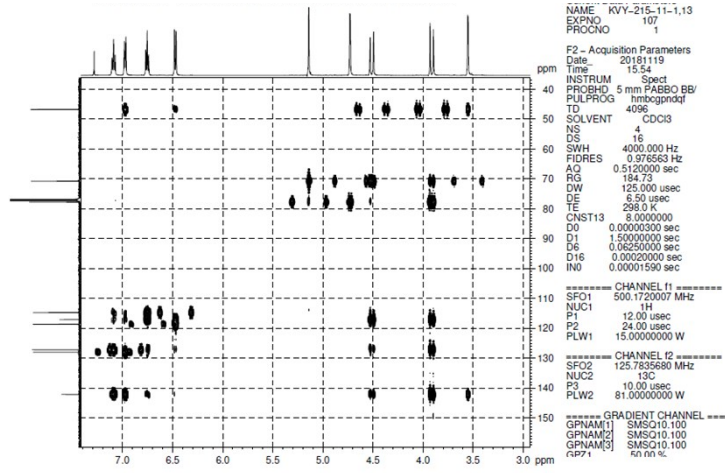

Comment 1 KVV-215  
Comment 2 SA RP

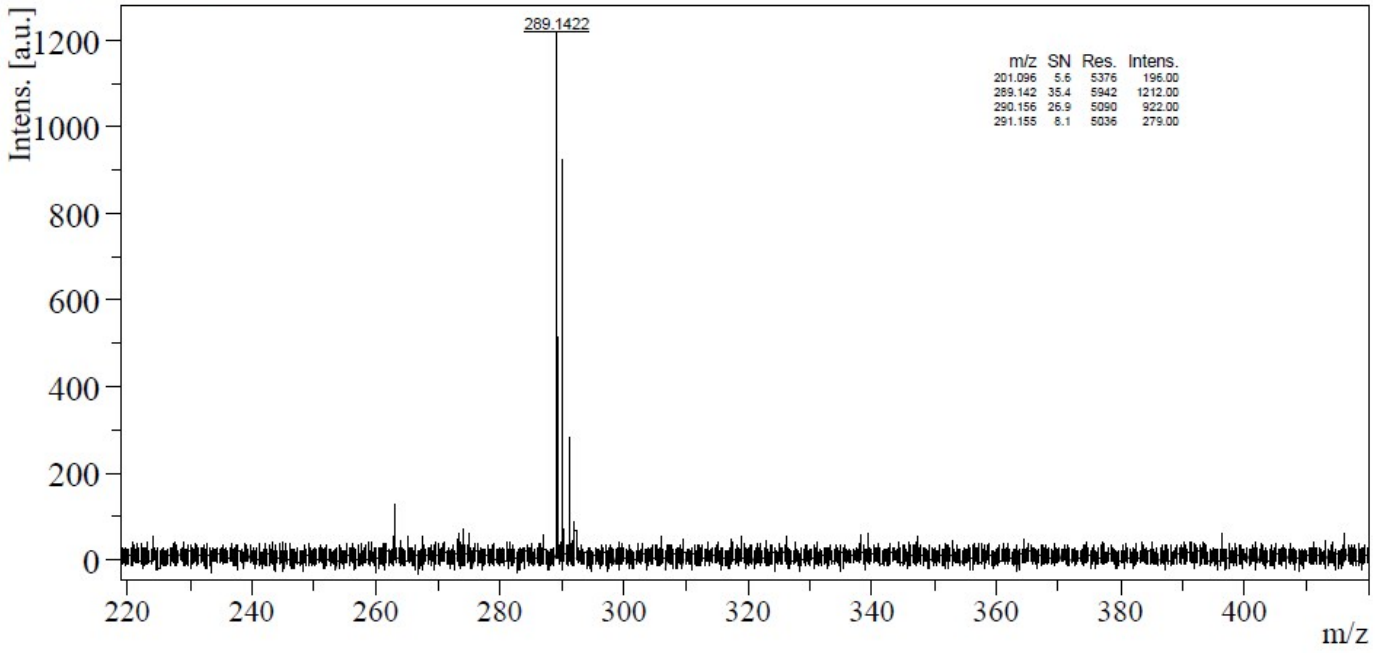

12-Cyclopropyl-12,13,13b,13c-tetrahydro-6*H*,11*H*,14*H*-4b,5a,10b,12,13a-pentaazadibenzo[*a,h*]cyclohepta[1,2,3,4-*def*]fluorene (3)

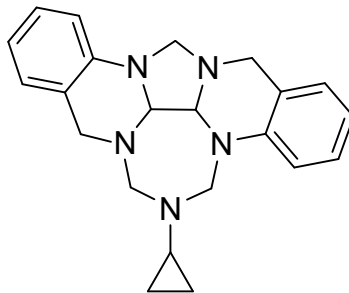

Figure 2. NMR and MS spectra of compound 3.

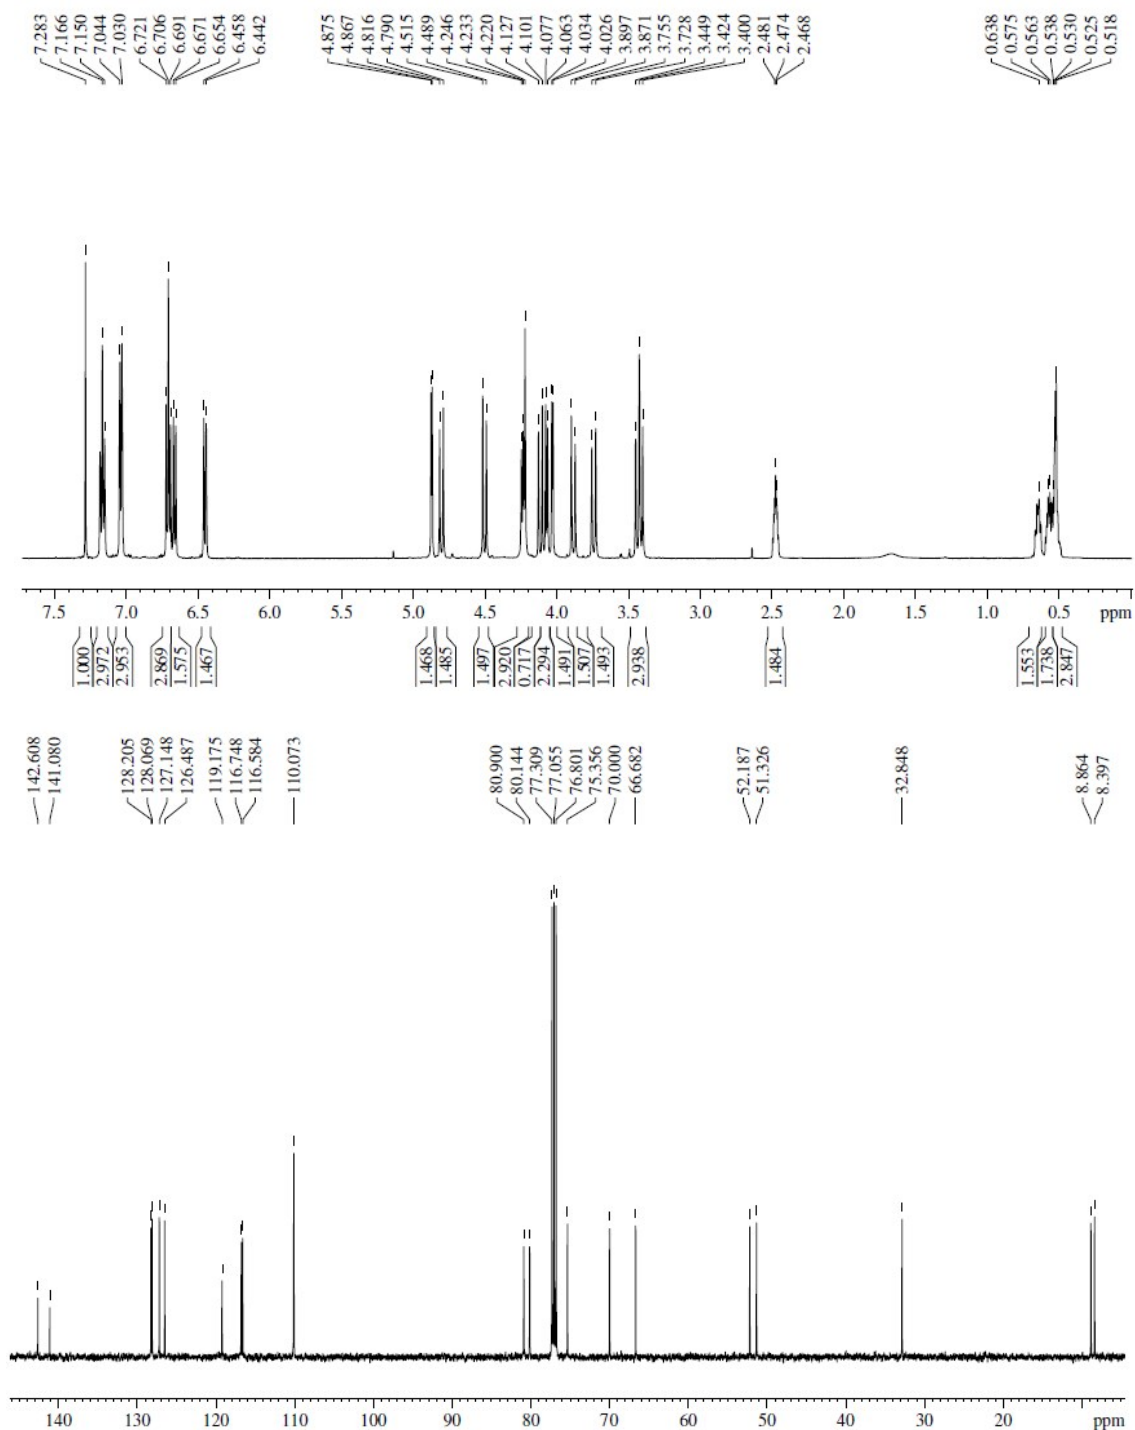

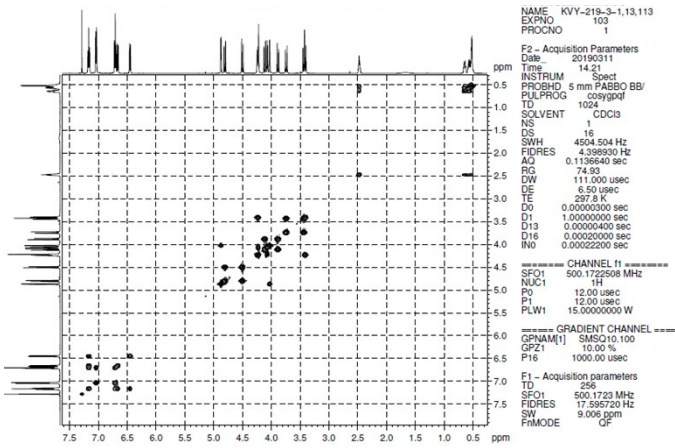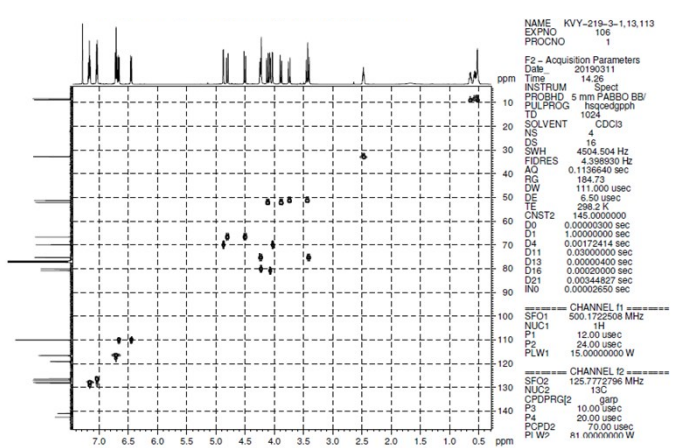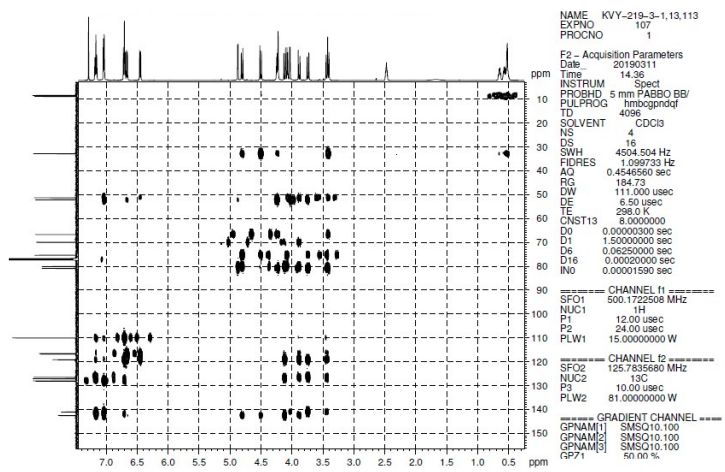

Comment 1 KVV-219  
 Comment 2 SA RP

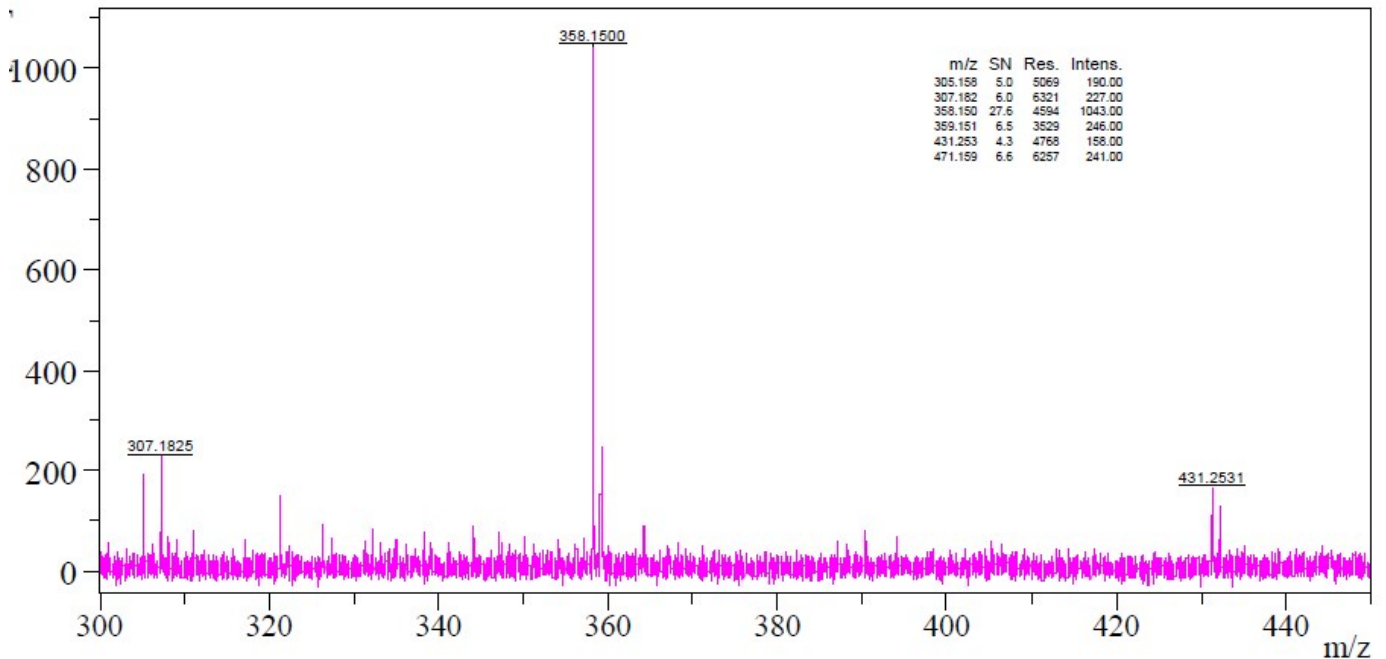

12-Cyclopentyl-12,13,13b,13c-tetrahydro-6*H*,11*H*,14*H*-4b,5a,10b,12,13a-pentaazadibenzo[*a,h*]cyclohepta[1,2,3,4-*def*]fluorene (4).

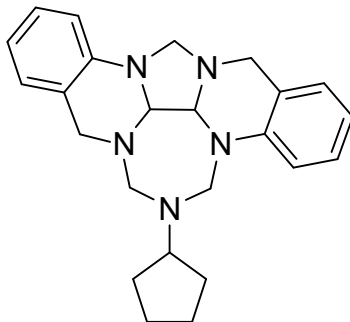

Figure 3. NMR and MS spectra of compound 4.

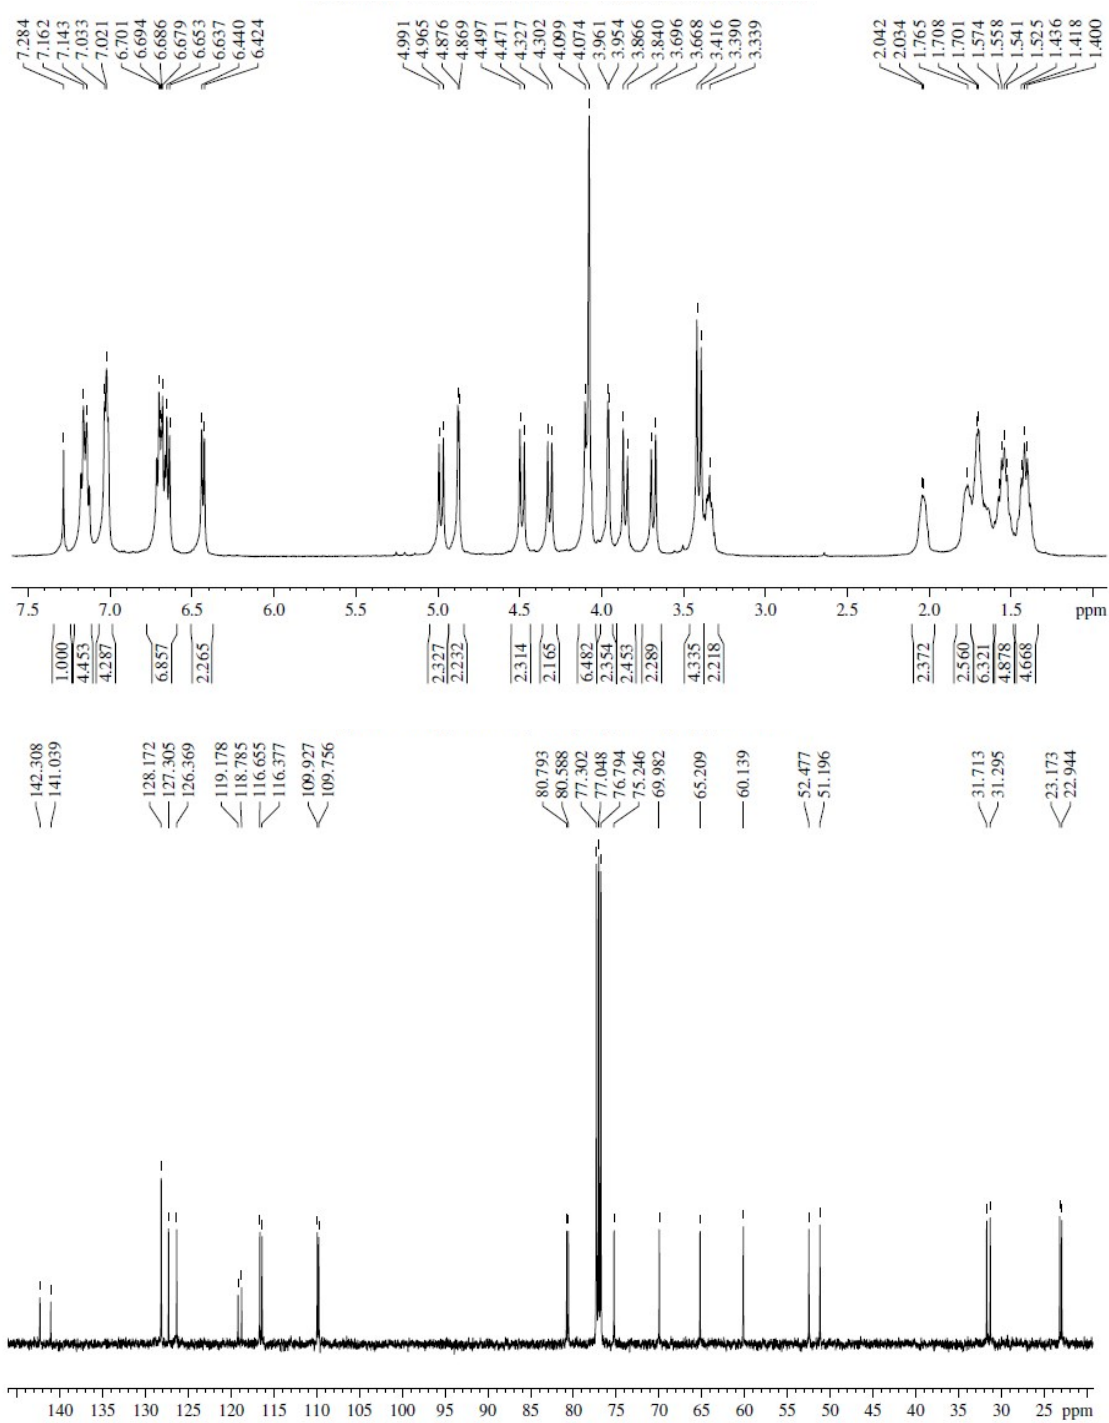

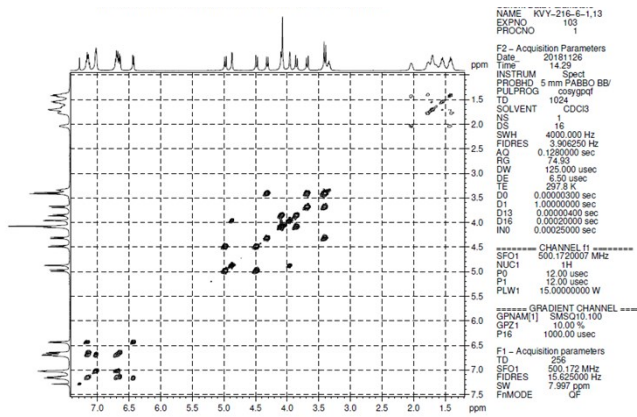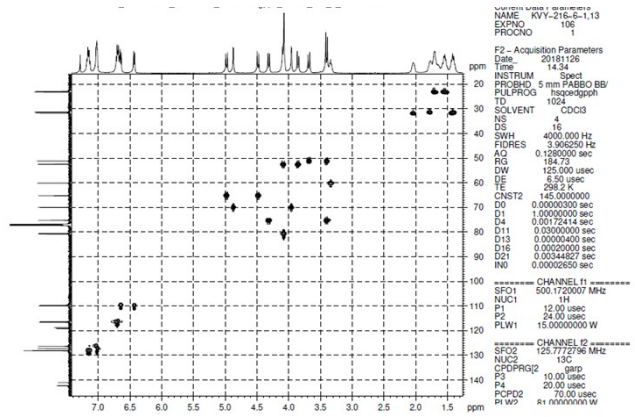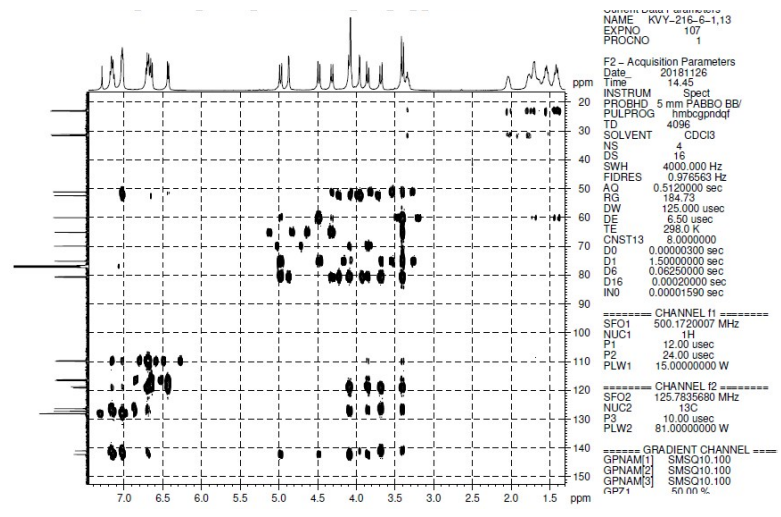

Comment 1 KVV-716  
Comment 2 SA RP

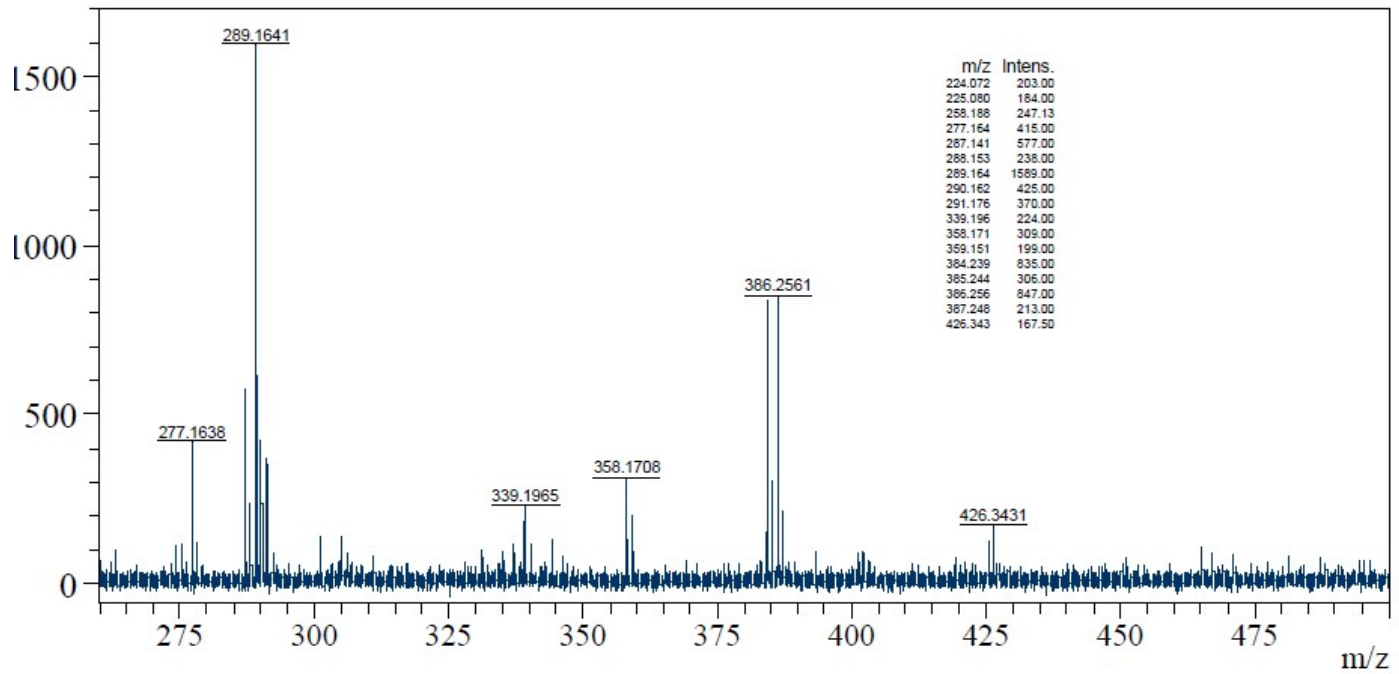

12-Cyclohexyl-12,13,13b,13c-tetrahydro-6*H*,11*H*,14*H*-4b,5a,10b,12,13a-pentaazadibenzo[*a,h*]cyclohepta[1,2,3,4-*def*]fluorene (**5**).

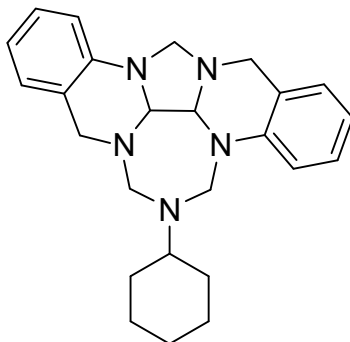

Figure 4. NMR and MS spectra of compound **5**.

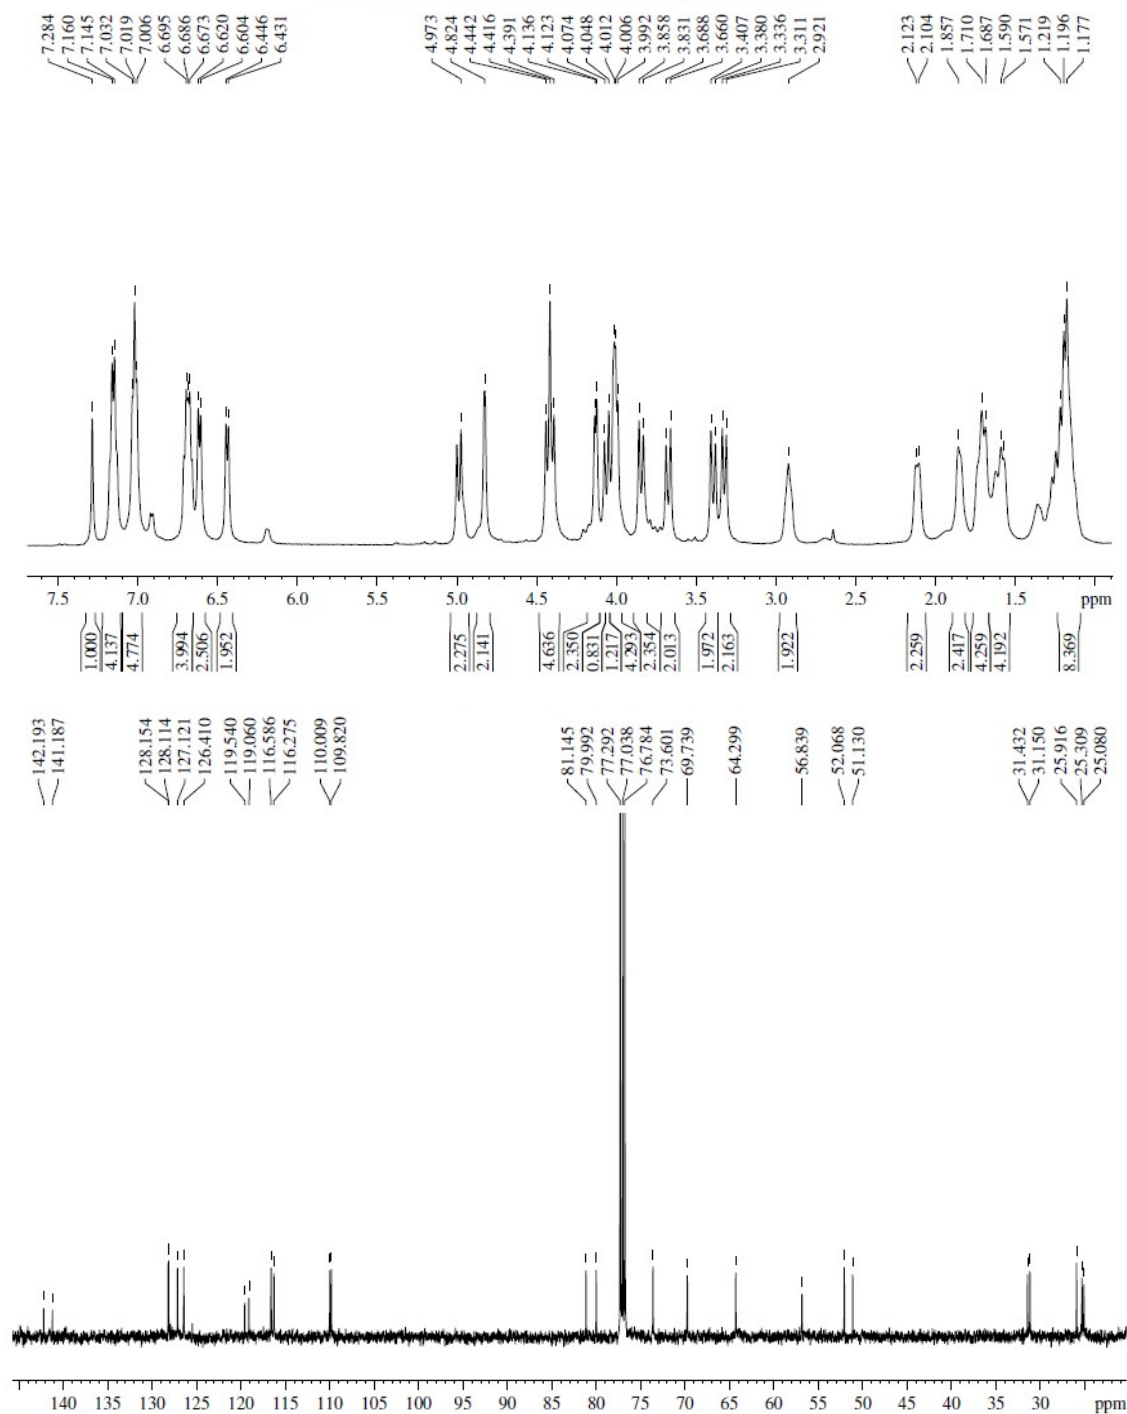



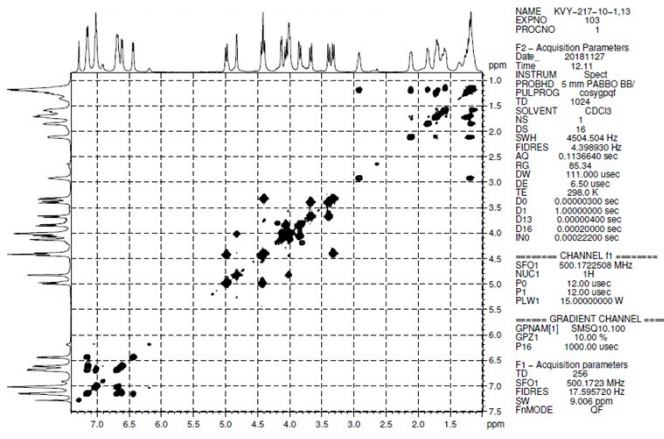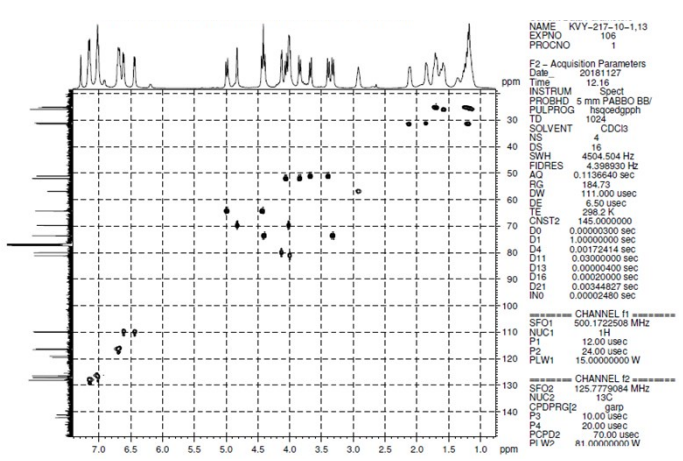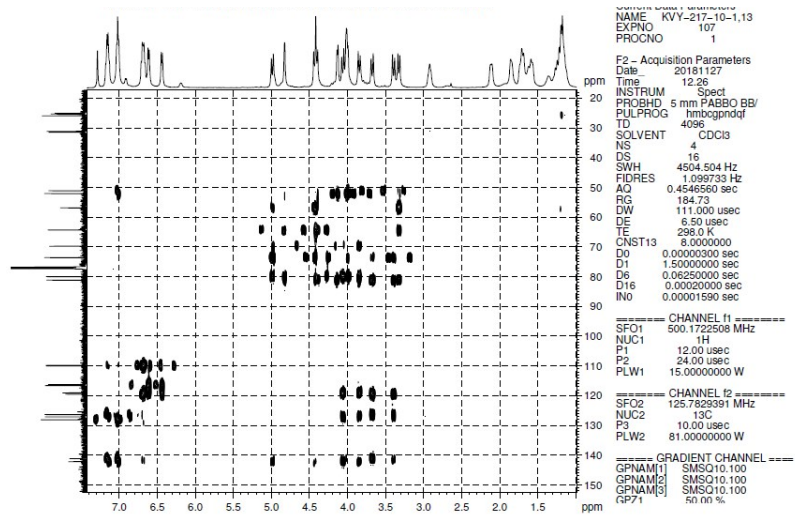

Comment 1 REB-217  
 Comment 2 SA RP

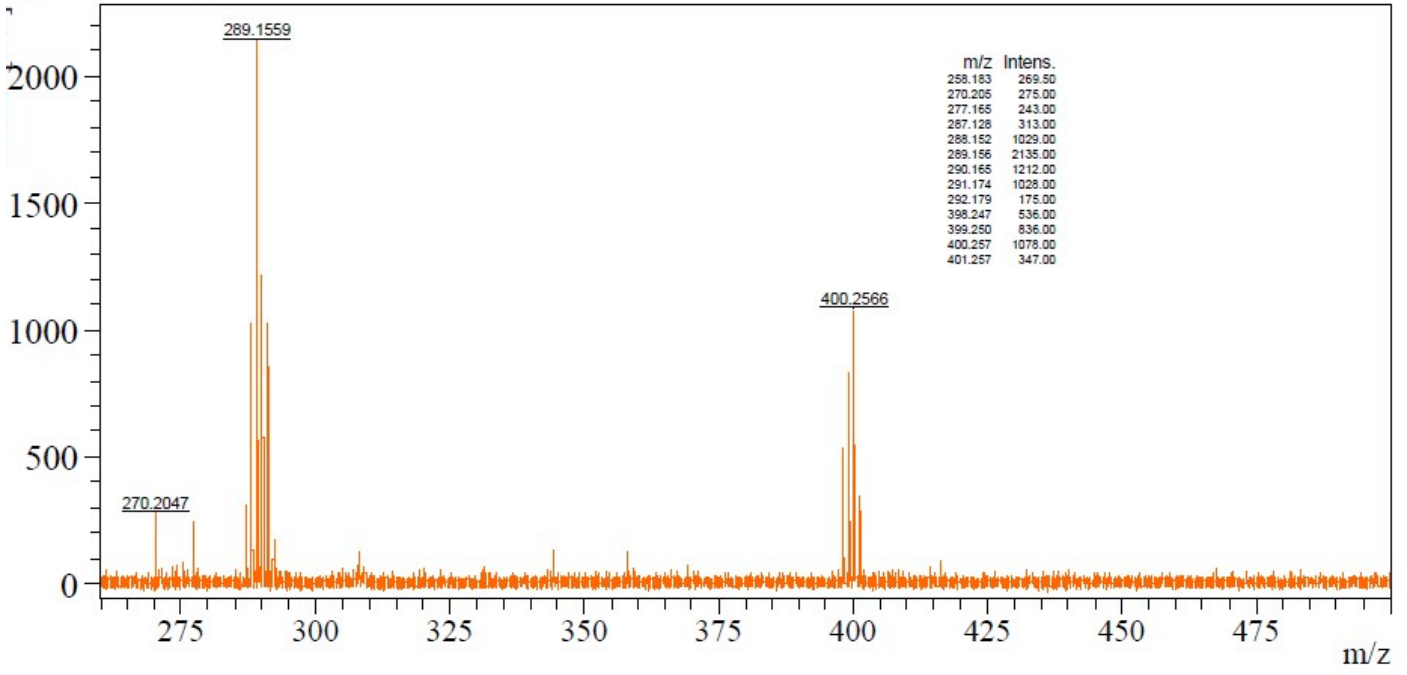

12-Cycloheptyl-12,13,13b,13c-tetrahydro-6*H*,11*H*,14*H*-4b,5a,10b,12,13a-pentaazadibenzo[*a,h*]cyclohepta[1,2,3,4-*def*]fluorene (6).

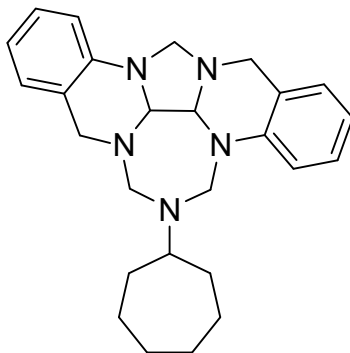

Figure 5. NMR spectra of compound 6.

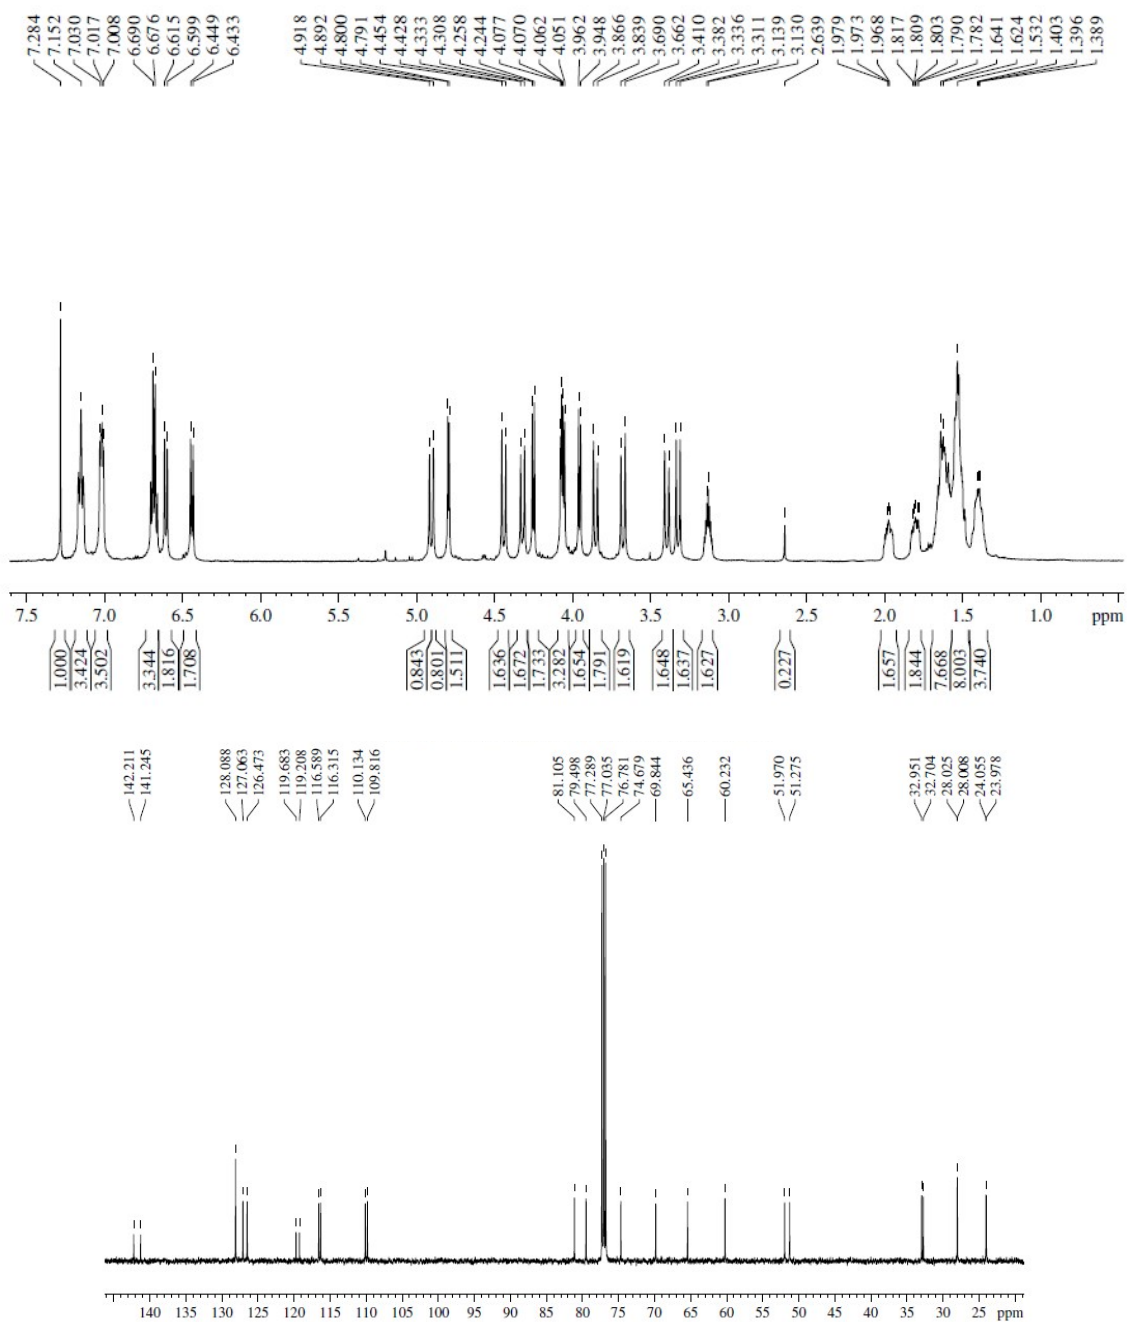

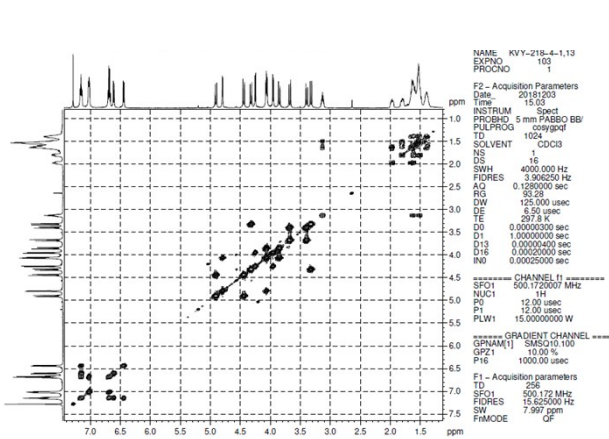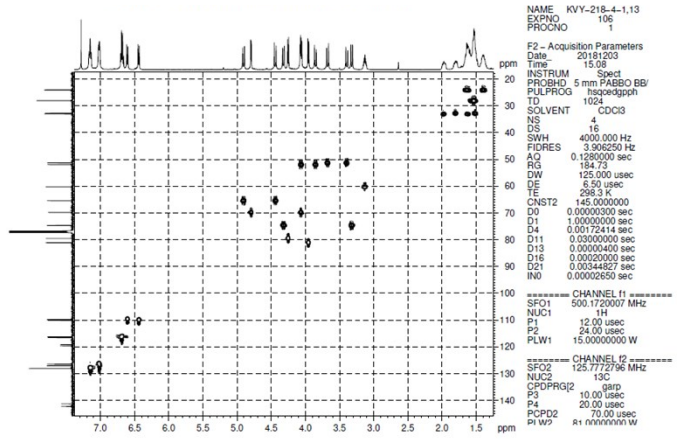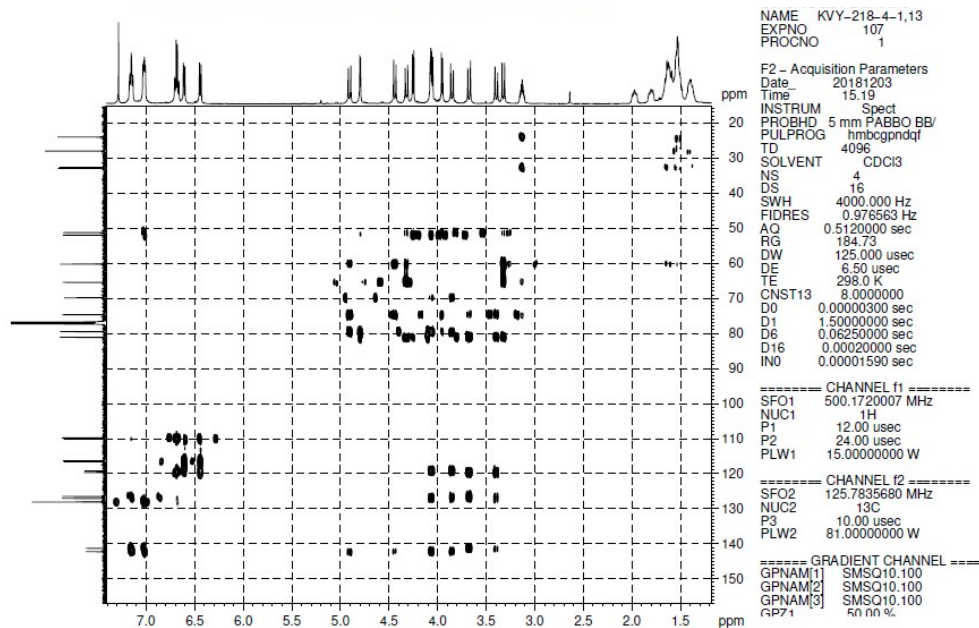

12-Cyclooctyl-12,13,13b,13c-tetrahydro-6*H*,11*H*,14*H*-4b,5a,10b,12,13a-pentaazadibenzo[*a,h*]cyclohepta[1,2,3,4-*def*]fluorene (7).

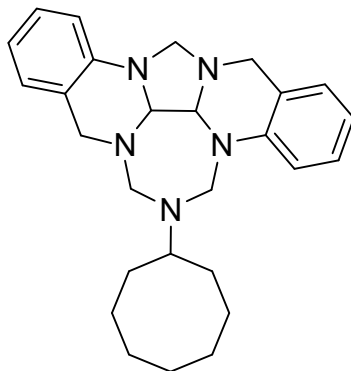

Figure 6. NMR and MS spectra of compound 7.

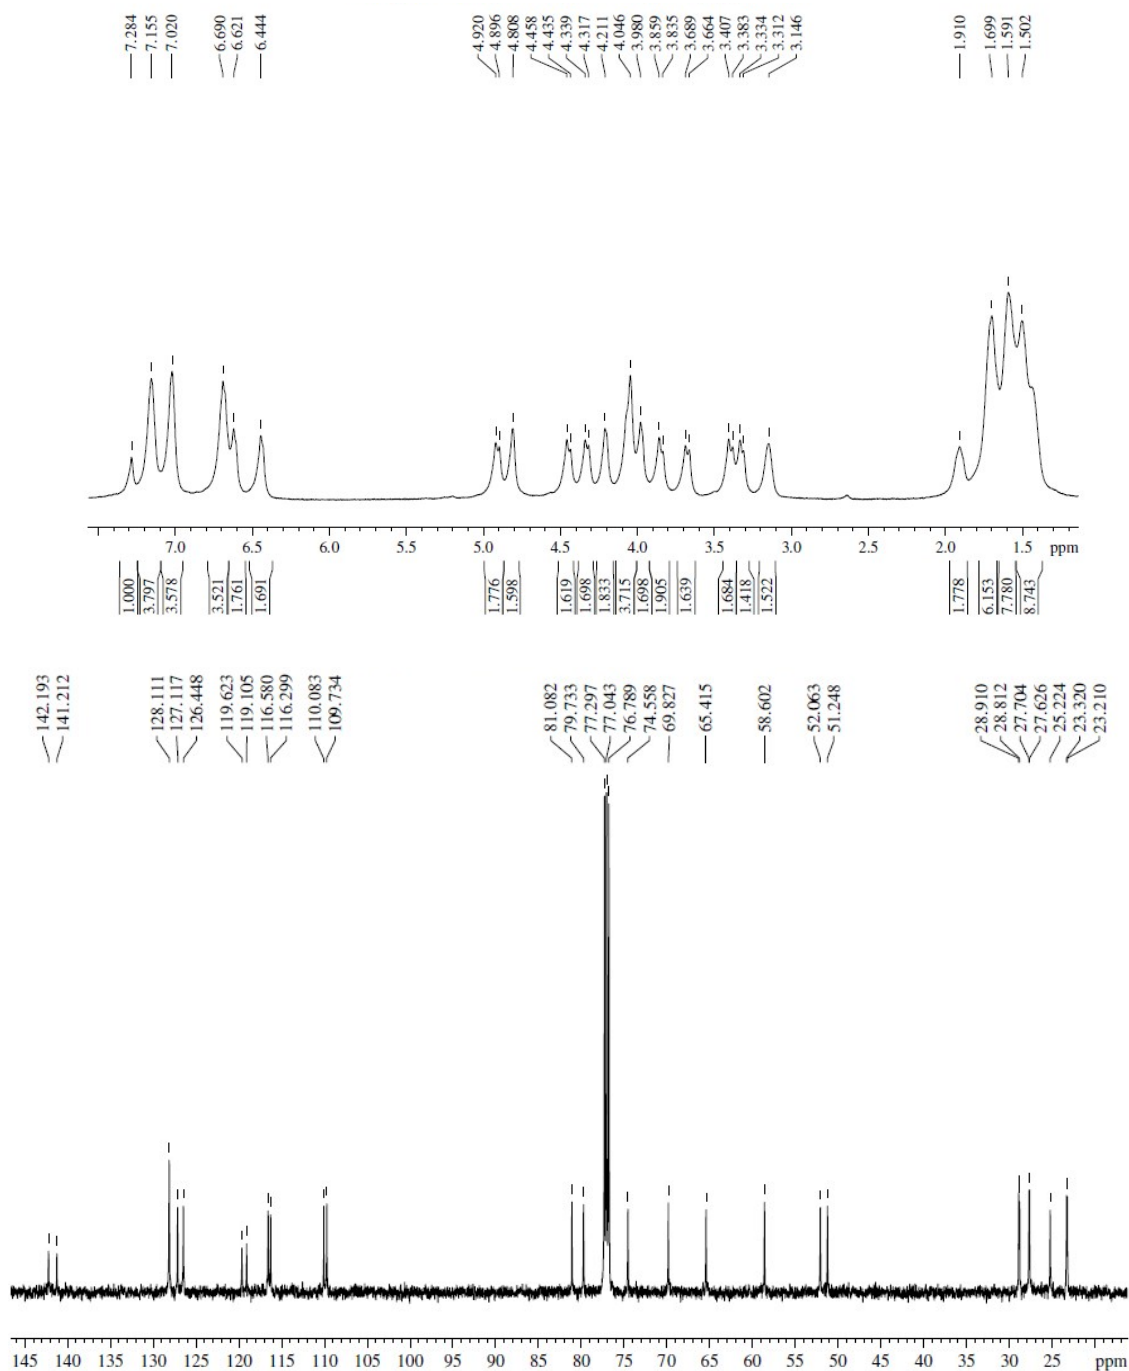

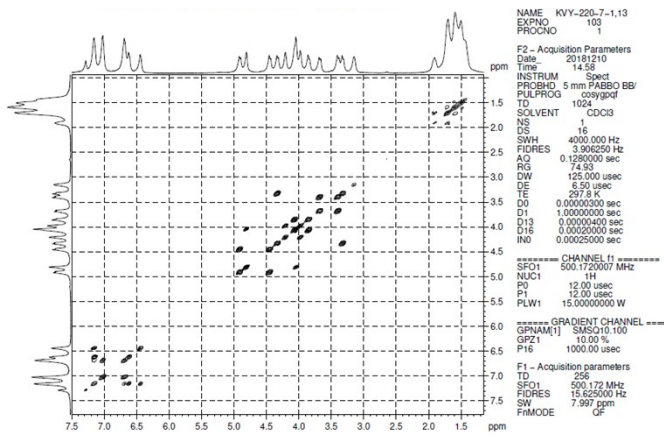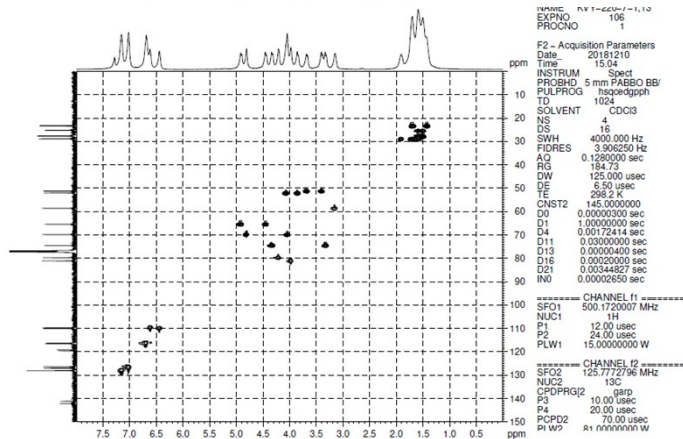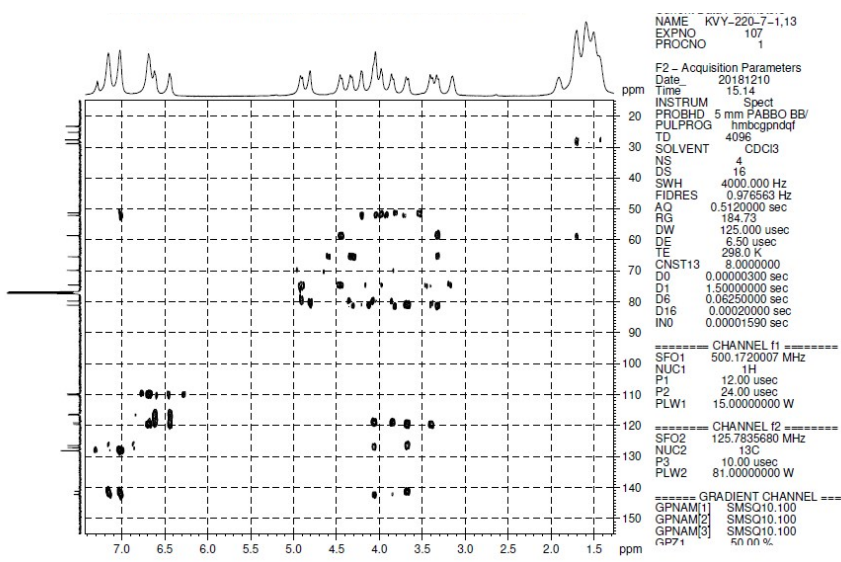

Comment 1 REB-220  
Comment 2 SA RP

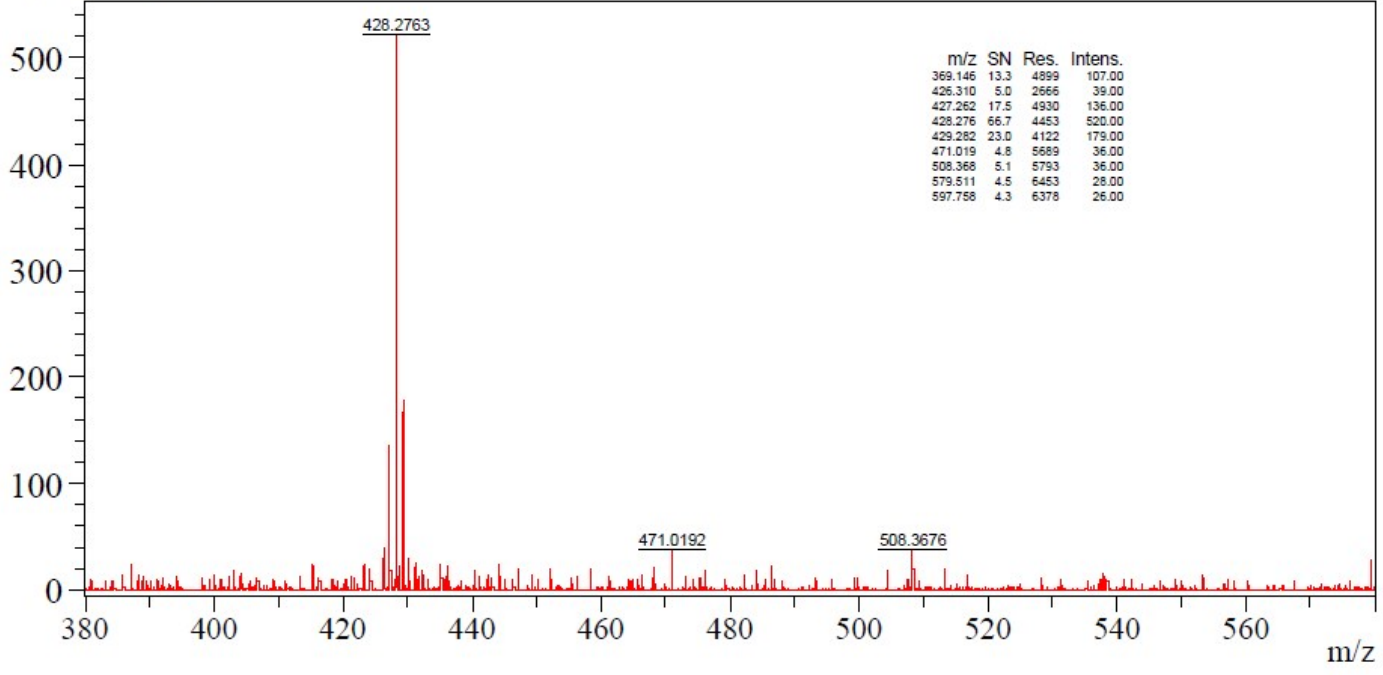

12-Dibicyclo[2.2.1]hept-2-yl-12,13,13b,13c-tetrahydro-6*H*,11*H*,14*H*-4*b*,5*a*,10*b*,12,13*a*-pentaazadibenzo[*a,h*]cyclohepta[1,2,3,4-*def*]fluorene (**8**).

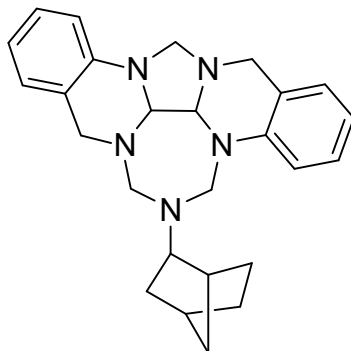

Figure 7. NMR and MS spectra of compound **8**.

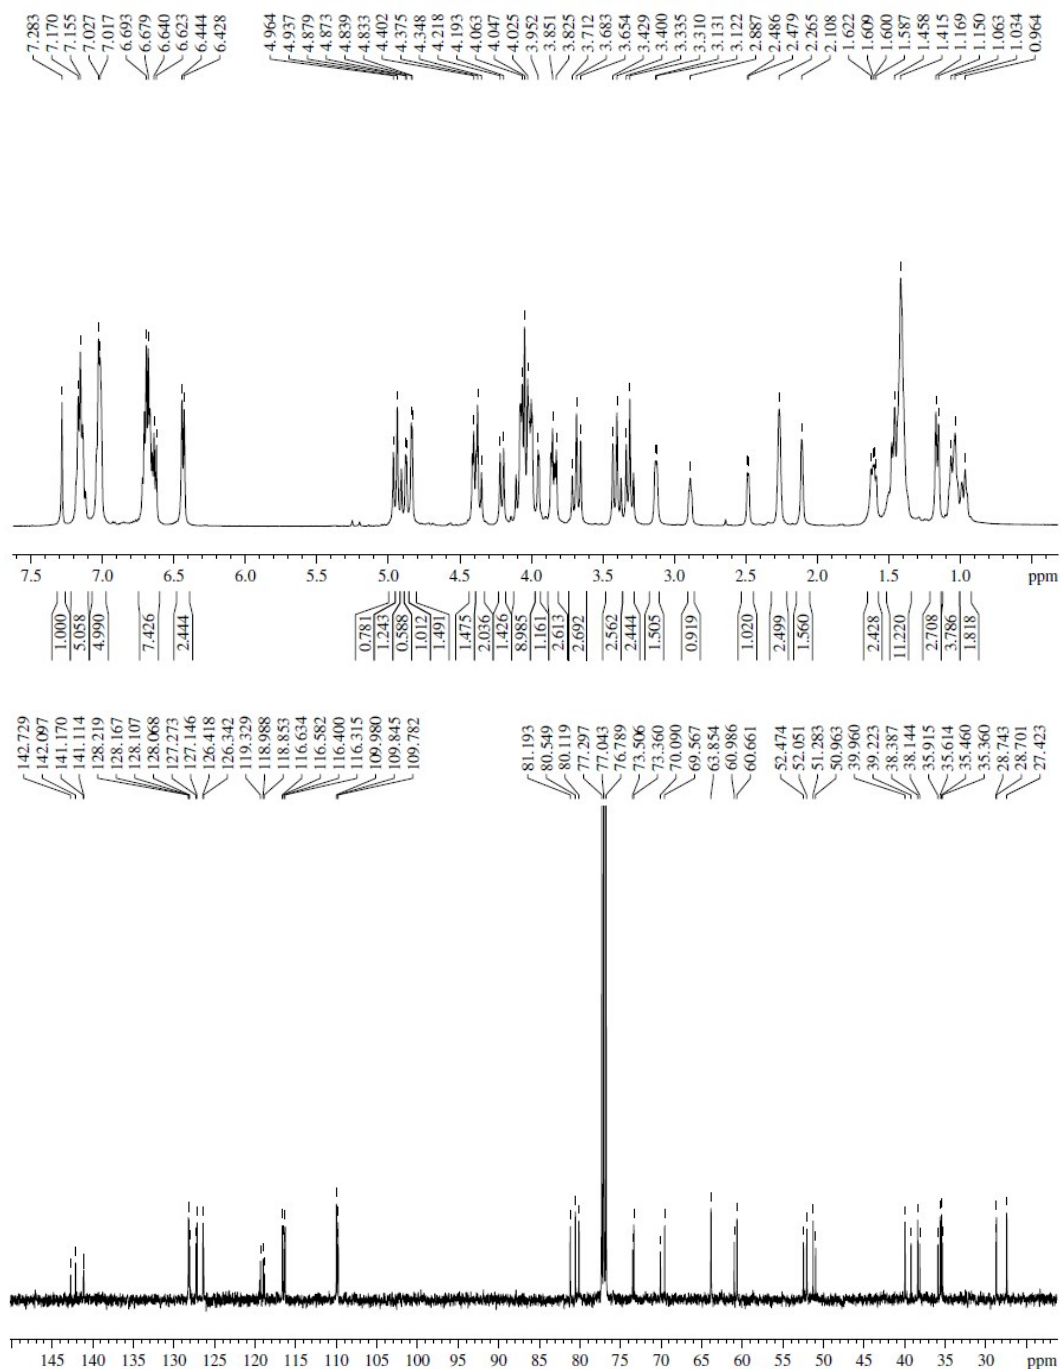

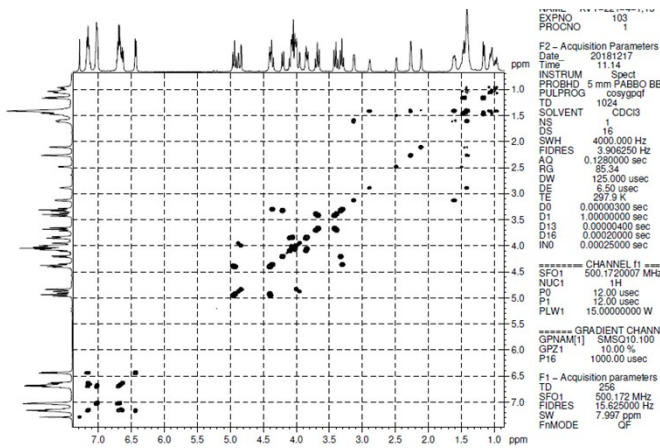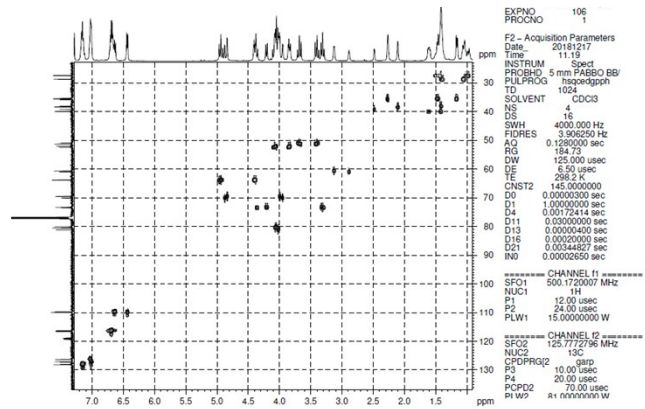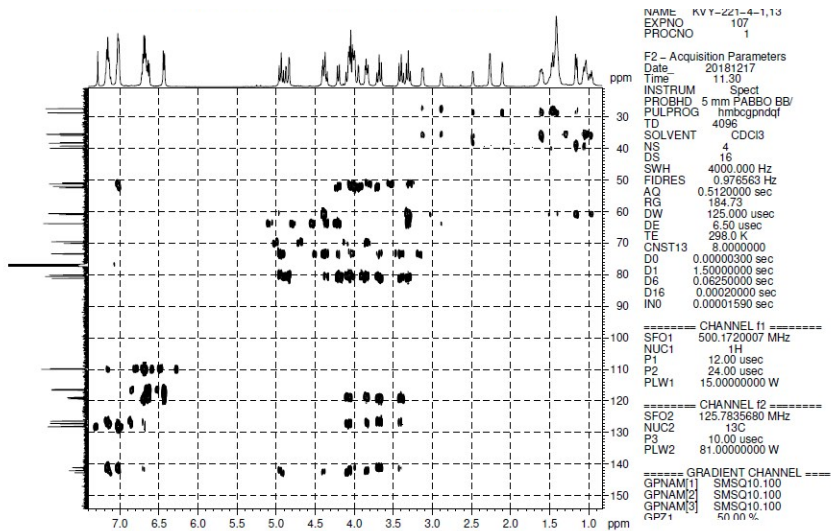

Comment 1 KVV-221  
Comment 2 SA RP

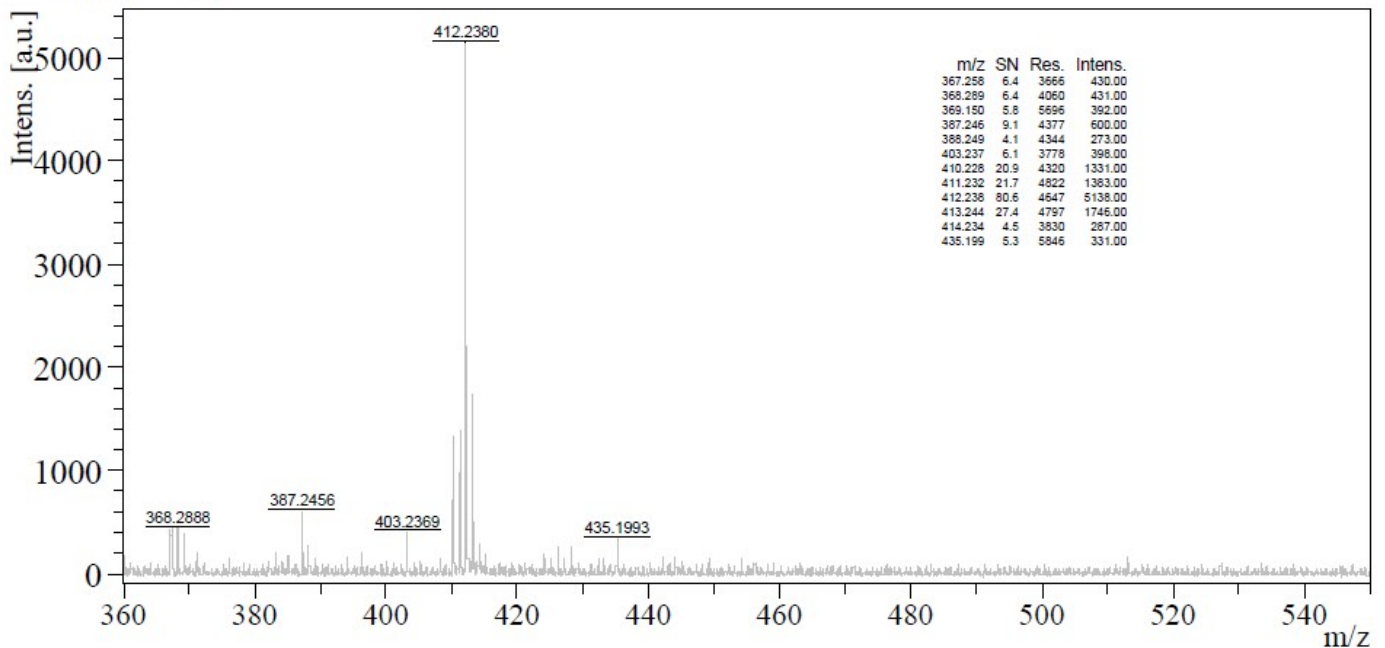

### X-ray data of compound **3**

Figure 8. (a) The asymmetric unit of compound **3**. Non-hydrogen atoms are represented by thermal ellipsoids ( $p = 30\%$ ) (b) The part of the crystal structure **3**, view along  $a$  axis.

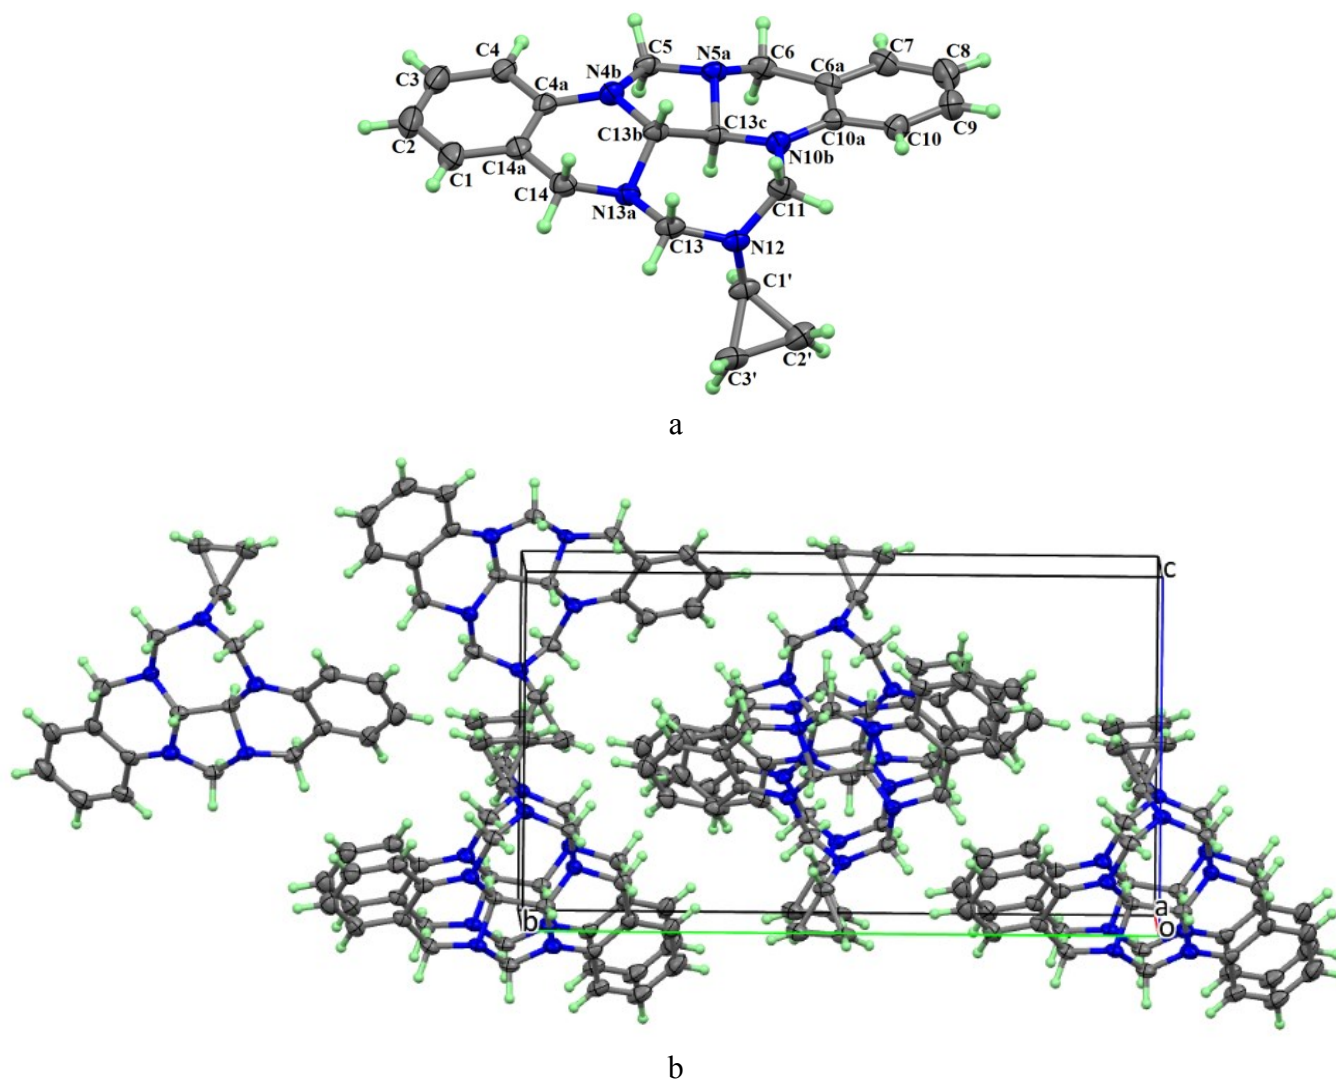

Table 1. Crystal data and structure refinement for compound **3**.

|                   |                   |
|-------------------|-------------------|
| CCDC              | 1990121           |
| Empirical formula | $C_{22}H_{25}N_5$ |
| Formula weight    | 359.47            |
| Temperature/K     | 293(2)            |
| Crystal system    | monoclinic        |
| Space group       | $P2_1/n$          |
| $a/\text{\AA}$    | 9.5806(4)         |
| $b/\text{\AA}$    | 18.4584(9)        |
| $c/\text{\AA}$    | 10.4334(4)        |
| $\alpha/^\circ$   | 90                |
| $\beta/^\circ$    | 91.070(4)         |



|                                                |                                                             |
|------------------------------------------------|-------------------------------------------------------------|
| $\gamma/^\circ$                                | 90                                                          |
| Volume/ $\text{\AA}^3$                         | 1844.74(14)                                                 |
| Z                                              | 4                                                           |
| $\rho_{\text{calc}}/\text{g/cm}^3$             | 1.294                                                       |
| $\mu/\text{mm}^{-1}$                           | 0.079                                                       |
| F(000)                                         | 768.0                                                       |
| Radiation                                      | MoK $\alpha$ ( $\lambda = 0.71073$ )                        |
| 2 $\Theta$ range for data collection/ $^\circ$ | 4.79 to 58.022                                              |
| Indexranges                                    | $-7 \leq h \leq 12, -13 \leq k \leq 24, -14 \leq l \leq 14$ |
| Reflectionscollected                           | 8627                                                        |
| Independentreflections                         | 4221 [ $R_{\text{int}} = 0.0219$ ]                          |
| Data/restraints/parameters                     | 4221/0/244                                                  |
| Goodness-of-fit on $F^2$                       | 1.019                                                       |
| Final R indexes [ $I \geq 2\sigma(I)$ ]        | $R_1 = 0.0479, wR_2 = 0.1079$                               |
| Final R indexes [all data]                     | $R_1 = 0.0880, wR_2 = 0.1270$                               |
| Largest diff. peak/hole / $e \text{\AA}^{-3}$  | 0.14/-0.18                                                  |

Table 2. Bond Lengths for compound **3**,  $\text{\AA}$ .

| Bond      |            | Bond      |          |
|-----------|------------|-----------|----------|
| N5A–C13C  | 1.4542(17) | C13C–C13B | 1.511(2) |
| N5A–C6    | 1.4487(19) | C6A–C6    | 1.495(2) |
| N5A–C5    | 1.4436(19) | C6A–C7    | 1.384(2) |
| C10A–N10B | 1.386(2)   | C4A–C14A  | 1.397(2) |
| C10A–C6A  | 1.404(2)   | C4A–C4    | 1.396(2) |
| C10A–C10  | 1.398(2)   | C14–C14A  | 1.490(2) |
| N12–C13   | 1.429(2)   | C14A–C1   | 1.377(2) |
| N12–C11   | 1.4266(19) | C4–C3     | 1.373(2) |
| N12–C1'   | 1.4224(19) | C10–C9    | 1.378(2) |
| N13A–C13B | 1.4526(18) | C1'–C3'   | 1.485(2) |
| N13A–C14  | 1.469(2)   | C1'–C2'   | 1.493(2) |
| N13A–C13  | 1.4714(18) | C7–C8     | 1.377(2) |
| N10B–C13C | 1.4419(18) | C1–C2     | 1.380(3) |
| N10B–C11  | 1.4663(18) | C3'–C2'   | 1.480(3) |
| N4B–C13B  | 1.4601(18) | C9–C8     | 1.364(3) |
| N4B–C4A   | 1.3733(19) | C3–C2     | 1.373(3) |
| N4B–C5    | 1.443(2)   |           |          |

Table 3. Bond Angles for compound **3**,  $^\circ$

| Angle       |            | Angle         |            |
|-------------|------------|---------------|------------|
| C6–N5A–C13C | 111.64(11) | N4B–C13B–C13C | 100.98(11) |
| C5–N5A–C13C | 103.73(11) | N5A–C6–C6A    | 108.98(12) |

|                |            |               |            |
|----------------|------------|---------------|------------|
| C5–N5A–C6      | 115.02(12) | N4B–C4A–C14A  | 118.86(15) |
| N10B–C10A–C6A  | 119.96(14) | N4B–C4A–C4    | 121.49(16) |
| N10B–C10A–C10  | 122.12(14) | C4–C4A–C14A   | 119.63(16) |
| C10–C10A–C6A   | 117.88(16) | N13A–C14–C14A | 111.04(13) |
| C11–N12–C13    | 117.66(13) | C4A–C14A–C14  | 118.87(15) |
| C1'–N12–C13    | 117.45(13) | C1–C14A–C4A   | 118.73(17) |
| C1'–N12–C11    | 116.80(14) | C1–C14A–C14   | 122.40(17) |
| C13B–N13A–C14  | 109.25(12) | N12–C13–N13A  | 116.27(12) |
| C13B–N13A–C13  | 109.26(11) | N12–C11–N10B  | 115.95(12) |
| C14–N13A–C13   | 107.67(12) | C3–C4–C4A     | 120.24(19) |
| C10A–N10B–C13C | 118.28(12) | C9–C10–C10A   | 120.71(17) |
| C10A–N10B–C11  | 122.16(12) | N4B–C5–N5A    | 101.93(11) |
| C13C–N10B–C11  | 117.94(12) | N12–C1'–C3'   | 117.72(14) |
| C4A–N4B–C13B   | 121.96(13) | N12–C1'–C2'   | 117.13(14) |
| C4A–N4B–C5     | 123.03(13) | C3'–C1'–C2'   | 59.60(11)  |
| C5–N4B–C13B    | 110.68(12) | C8–C7–C6A     | 121.82(17) |
| N5A–C13C–C13B  | 101.26(11) | C14A–C1–C2    | 121.4(2)   |
| N10B–C13C–N5A  | 109.36(11) | C2'–C3'–C1'   | 60.48(11)  |
| N10B–C13C–C13B | 116.90(12) | C8–C9–C10     | 121.28(18) |
| C10A–C6A–C6    | 120.55(15) | C3'–C2'–C1'   | 59.92(11)  |
| C7–C6A–C10A    | 119.44(15) | C9–C8–C7      | 118.68(19) |
| C7–C6A–C6      | 119.97(14) | C2–C3–C4      | 120.22(19) |
| N13A–C13B–N4B  | 111.40(12) | C3–C2–C1      | 119.75(19) |
| N13A–C13B–C13C | 114.19(12) |               |            |

Table 4. Interaction Energies [ $E_{\text{int}}$ ] for the Main Hyperconjugative Interactions in compound **3**.

| Interaction                                                             | $E_{\text{int}}$ , kcal/mol | Interaction                                                             | $E_{\text{int}}$ , kcal/mol |
|-------------------------------------------------------------------------|-----------------------------|-------------------------------------------------------------------------|-----------------------------|
| LP(N <sup>12</sup> ) → $\sigma^*$ (C <sup>11</sup> –N <sup>10b</sup> )  | 15.60                       | LP(N <sup>12</sup> ) → $\sigma^*$ (C <sup>13</sup> –N <sup>13a</sup> )  | 14.49                       |
| LP(N <sup>10b</sup> ) → $\sigma^*$ (C <sup>11</sup> –N <sup>12</sup> )  | 3.76                        | LP(N <sup>13a</sup> ) → $\sigma^*$ (C <sup>13</sup> –N <sup>12</sup> )  | 1.18                        |
| LP(N <sup>10b</sup> ) → $\sigma^*$ (C <sup>10a</sup> –C <sup>10</sup> ) | 41.62                       | LP(N <sup>4b</sup> ) → $\sigma^*$ (C <sup>4a</sup> –C <sup>14a</sup> )  | 38.47                       |
| LP(N <sup>10b</sup> ) → $\sigma^*$ (N <sup>5a</sup> –C <sup>13c</sup> ) | 2.94                        | LP(N <sup>4b</sup> ) → $\sigma^*$ (N <sup>13a</sup> –C <sup>13b</sup> ) | 4.52                        |
| LP(N <sup>13a</sup> ) → $\sigma^*$ (N <sup>4b</sup> –C <sup>13b</sup> ) | 1.02                        | LP(N <sup>5a</sup> ) → $\sigma^*$ (C <sup>13c</sup> –N <sup>10b</sup> ) | 2.49                        |
| LP(N <sup>5a</sup> ) → $\sigma^*$ (C <sup>13c</sup> –H <sup>13c</sup> ) | 6.06                        | LP(N <sup>5a</sup> ) → $\sigma^*$ (C <sup>5</sup> –H <sup>5b</sup> )    | 5.96                        |
| LP(N <sup>5a</sup> ) → $\sigma^*$ (C <sup>5</sup> –H <sup>5a</sup> )    | 2.15                        |                                                                         |                             |

Table 5. The Some of Geometric parameters (Å, °) for compound **3**.

|                                    |         |                                   |         |                                    |         |                                    |         |
|------------------------------------|---------|-----------------------------------|---------|------------------------------------|---------|------------------------------------|---------|
| N <sup>4b</sup> –C <sup>4a</sup>   | 1.373 Å | N <sup>13a</sup> –C <sup>14</sup> | 1.469 Å | N <sup>5a</sup> –C <sup>5</sup>    | 1.444 Å | N <sup>10b</sup> –C <sup>13c</sup> | 1.442 Å |
| N <sup>4b</sup> –C <sup>5</sup>    | 1.444 Å | N <sup>13a</sup> –C <sup>13</sup> | 1.471 Å | N <sup>5a</sup> –C <sup>6</sup>    | 1.449 Å | N <sup>10b</sup> –C <sup>11</sup>  | 1.466 Å |
| N <sup>4b</sup> –C <sup>13b</sup>  | 1.460 Å | N <sup>12</sup> –C <sup>13</sup>  | 1.429 Å | N <sup>5a</sup> –C <sup>13c</sup>  | 1.454 Å | N <sup>12</sup> –C <sup>11</sup>   | 1.427 Å |
| N <sup>13a</sup> –C <sup>13b</sup> | 1.453 Å | N <sup>12</sup> –C <sup>1'</sup>  | 1.422 Å | N <sup>10b</sup> –C <sup>10a</sup> | 1.386 Å | $\sum \angle \text{N12}$           | 351.9°  |
| $\sum \angle \text{N4b}$           | 355.65° | $\sum \angle \text{N5a}$          | 330.39° | $\sum \angle \text{N13a}$          | 326.19° | $\sum \angle \text{N10b}$          | 358.38° |

Table 6. Topological parameters of electron density at the (3, -1) BCPs of compound **3**.

| Bond                               | $\rho(r)$ , e/au <sup>3</sup> | $-\nabla^2\rho(r)$ , e/au <sup>5</sup> | $\epsilon$ | Bond                               | $\rho(r)$ , e/au <sup>3</sup> | $-\nabla^2\rho(r)$ , e/au <sup>5</sup> | $\epsilon$ |
|------------------------------------|-------------------------------|----------------------------------------|------------|------------------------------------|-------------------------------|----------------------------------------|------------|
| C <sup>1</sup> -C <sup>2</sup>     | 0.3180                        | 0.8377                                 | 0.5006     | C <sup>11</sup> -N <sup>12</sup>   | 0.2906                        | 0.9783                                 | 0.0254     |
| C <sup>2</sup> -C <sup>3</sup>     | 0.3230                        | 1.0861                                 | 0.0382     | N <sup>12</sup> -C <sup>13</sup>   | 0.2884                        | 0.9616                                 | 0.0135     |
| C <sup>3</sup> -C <sup>4</sup>     | 0.3220                        | 0.8619                                 | 0.3018     | C <sup>13</sup> -N <sup>13a</sup>  | 0.2717                        | 0.8315                                 | 0.0571     |
| C <sup>4</sup> -C <sup>4a</sup>    | 0.3109                        | 0.9916                                 | 0.0531     | N <sup>13a</sup> -C <sup>14</sup>  | 0.2715                        | 0.8148                                 | 0.0207     |
| C <sup>4a</sup> -N <sup>4b</sup>   | 0.3126                        | 1.1312                                 | 0.0189     | C <sup>14</sup> -C <sup>14a</sup>  | 0.2672                        | 0.6907                                 | 0.0239     |
| N <sup>4b</sup> -C <sup>5</sup>    | 0.2794                        | 0.8903                                 | 0.0426     | C <sup>14a</sup> -C <sup>1</sup>   | 0.3211                        | 1.0485                                 | 0.0421     |
| C <sup>5</sup> -N <sup>5a</sup>    | 0.2896                        | 0.9342                                 | 0.0449     | N <sup>10b</sup> -C <sup>13c</sup> | 0.2814                        | 0.8719                                 | 0.0378     |
| N <sup>5a</sup> -C <sup>6</sup>    | 0.2784                        | 0.8861                                 | 0.0175     | C <sup>13b</sup> -C <sup>13c</sup> | 0.2664                        | 0.6944                                 | 0.0072     |
| C <sup>6</sup> -C <sup>6a</sup>    | 0.2660                        | 0.6865                                 | 0.0243     | N <sup>13a</sup> -C <sup>13b</sup> | 0.2853                        | 0.8719                                 | 0.0494     |
| C <sup>6a</sup> -C <sup>7</sup>    | 0.3166                        | 0.8053                                 | 0.5120     | N <sup>5a</sup> -C <sup>13c</sup>  | 0.2878                        | 0.8762                                 | 0.0476     |
| C <sup>7</sup> -C <sup>8</sup>     | 0.3207                        | 1.0683                                 | 0.0376     | N <sup>4b</sup> -C <sup>13b</sup>  | 0.2751                        | 0.8053                                 | 0.0424     |
| C <sup>8</sup> -C <sup>9</sup>     | 0.3283                        | 0.9029                                 | 0.5121     | C <sup>4a</sup> -C <sup>14a</sup>  | 0.3151                        | 0.7847                                 | 0.5546     |
| C <sup>9</sup> -C <sup>10</sup>    | 0.3190                        | 1.0495                                 | 0.0430     | N <sup>12</sup> -C <sup>1'</sup>   | 0.2897                        | 0.9626                                 | 0.0342     |
| C <sup>10</sup> -C <sup>10a</sup>  | 0.3094                        | 0.7781                                 | 0.5300     | C <sup>1'</sup> -C <sup>2'</sup>   | 0.2635                        | 0.5565                                 | 0.1649     |
| C <sup>6a</sup> -C <sup>10a</sup>  | 0.3092                        | 0.9603                                 | 0.0555     | C <sup>2'</sup> -C <sup>3'</sup>   | 0.2652                        | 0.6727                                 | 0.1373     |
| C <sup>10a</sup> -N <sup>10b</sup> | 0.3062                        | 1.1191                                 | 0.0170     | C <sup>3'</sup> -C <sup>1'</sup>   | 0.2676                        | 0.5828                                 | 0.1561     |
| N <sup>10b</sup> -C <sup>11</sup>  | 0.2624                        | 0.7927                                 | 0.0639     |                                    |                               |                                        |            |

Table 7. Topological parameters of electron density at the (3, -1) bond critical points for intermolecular interactions in crystal of **3**.

| Bond                                                   | $\rho(r)$ , e/au <sup>3</sup> | $\nabla^2\rho(r)$ , e/au <sup>5</sup> | $\epsilon$ | E, kcal/mol |
|--------------------------------------------------------|-------------------------------|---------------------------------------|------------|-------------|
| C <sup>11</sup> -H <sup>11b</sup> ...N <sup>4b</sup>   | 0.0071                        | 0.0242                                | 0.3612     | 1.47        |
| C <sup>13b</sup> -H <sup>13b</sup> ...N <sup>10b</sup> | 0.0093                        | 0.0296                                | 0.0540     | 2.03        |
| C <sup>13b</sup> -H <sup>13b</sup> ...N <sup>5a</sup>  | 0.0058                        | 0.0214                                | 1.6402     | 1.28        |
| C <sup>13b</sup> -H <sup>13b</sup> ...H <sup>13b</sup> | 0.0047                        | 0.0188                                | 1.5436     | 0.75        |
| C <sup>13</sup> -H <sup>13a</sup> ...N <sup>5a</sup>   | 0.0035                        | 0.0134                                | 0.1917     | 0.63        |
| C <sup>13c</sup> -H <sup>13c</sup> ... $\pi$           | 0.0057                        | 0.0155                                | 0.2116     | 0.75        |
| C <sup>6</sup> -H <sup>6b</sup> ... $\pi$              | 0.0073                        | 0.0241                                | 2.1849     | 1.22        |
| C <sup>5</sup> -H <sup>5b</sup> ... $\pi$              | 0.0027                        | 0.0080                                | 0.9858     | 0.34        |
| H <sup>5b</sup> ...H <sup>5b</sup>                     | 0.0030                        | 0.0094                                | 0.1218     | 0.41        |
| H <sup>6a</sup> ...H <sup>9</sup>                      | 0.0078                        | 0.0276                                | 0.0661     | 1.50        |
| H <sup>7</sup> ...H <sup>10</sup>                      | 0.0019                        | 0.0058                                | 0.0937     | 0.25        |
